# Supplementary material
Source: Research Square preprint supplement (doi:10.21203/rs.3.rs-8458923/v1)
Supplement: Supplementary file 1 [file 8e9bc087628fec9bce6683ad.docx]

**Appendix A - Survey Items Classified According to TPB Constructs**

**1. Attitude Toward the Behavior (ATT)**

*Beliefs and evaluations regarding plagiarism as favorable or unfavorable.*

| **Item No.** | **English Item** |
| --- | --- |
| 1 | Copying data from the internet and using it as one’s own without citation is appropriate. |
| 2 | Reusing one's own previous work in a new assignment without citation is normal. |
| 3 | Paraphrasing another person’s work with proper citation and references is appropriate. |
| 4 | Purchasing an article or research paper and treating it as one’s intellectual property is normal. |
| 5 | Hiring someone to write parts of a paper is acceptable as long as there is mutual agreement. |
| 6 | Copying results/ideas/texts from others is acceptable as long as proper citation is provided. |
| 9 | Plagiarism does not harm science because it does not alter or distort research results. |
| 10 | Plagiarism is inherently unethical. |
| 12 | Plagiarism is not a serious issue if it results in a good grade. |
| 13 | Responsibility for plagiarism lies solely with the plagiarizer. |
| 16 | Self-plagiarism is a harmless behavior. |
| 17 | Students in lower grades should receive lighter penalties for plagiarism compared to senior students. |
| 18 | If someone cannot write well in a foreign language (e.g., English), it is reasonable to copy similar texts in that language. |
| 19 | Plagiarism is as bad as stealing an exam paper. |
| 20 | Plagiarism discourages teachers when grading assignments. |
| 21 | Plagiarism should not be considered a serious violation because it involves taking words, not physical property. |
| 23 | Sometimes plagiarism is necessary. |
| 24 | I am concerned about the increasing rate of plagiarism in my class. |

**2. Subjective Norms (SN)**

*Perceived social pressure to perform or not perform the behavior.*

| **Item No.** | **English Item** |
| --- | --- |
| 7 | Plagiarism is not a serious problem nowadays because many others do it too. |
| 8 | If a friend allows me to copy their paper, it should not be considered plagiarism. |
| 14 | Students should report plagiarism or suspected plagiarism to their teachers. |
| 25 | Students often claim they do not plagiarize, but in reality, they do. |
| 26 | Teachers or school administrators do not impose any penalties for plagiarism. |
| 27 | Students plagiarize because they know that even teachers have done it. |

**3. Perceived Behavioral Control (PBC)**

*Perceived ease or difficulty in performing the behavior, and control over it.*

| **Item No.** | **English Item** |
| --- | --- |
| 11 | I cannot write an essay without plagiarizing. |
| 15 | Awareness-raising sessions on plagiarism should be conducted. |
| 22 | I continue to plagiarize because I haven’t been caught. |
| 23 | Sometimes plagiarism is necessary. *(Also partially reflects PBC due to perceived lack of alternatives.)* |
